# Supplementary material
Source: HighWire-hosted journal article supplement (https://www.annfammed.org/highwire/filestream/8591/field_highwire_adjunct_files/0/Tang_Supp_App.pdf)
Supplement: Tang_Supp_App.pdf [file Tang_Supp_App.pdf]

## Supplementary materials for:

Tang TS, Funnell MM, Sinco B, Spencer MS, Heisler M. Peer-led, empowerment-based approach to self-management efforts in diabetes (PLEASED): a randomized controlled trial in an African-American community. *Ann Fam Med*. 2015;13:S27-S35. Doi: 10.1370/afm.1819.

## Appendix: Using the Multivariate Delta Method to Report Logistic Regression Results with Repeated Measures

By Brandy R. Sinco, MS, University of Michigan, Ann Arbor, MI

### Generalized Estimating Equation With Repeated Measures

Note: This example uses time points, but could easily be extended to the four time points in this paper.

- Let  $i = 0$  for control and 1 for treatment.
- Let  $j = 1$  for pre-intervention and 2 for post-intervention.
- Let  $k = k^{\text{th}}$  subject.
- Let  $R = 0$  for control and 1 for treatment.
- Let  $T = 0$  for baseline and 1 for first follow-up.
- Let  $\pi =$  probability of success.

Generalized Estimating Equation for a Binary Outcome.

$$\text{logit}(\pi_{ijk}) = \ln(\pi_{ijk}/(1 - \pi_{ijk})) = (\beta_0 + \beta_1 R + \beta_2 T + \beta_3 RT + \varepsilon_{ijk}), \varepsilon_{ijk} = \text{error term.}$$

The  $\beta$  terms are assumed to be multivariate normal.

Estimated Mean:  $\ln(\pi_{ijk}/(1 - \pi_{ijk})) = \beta_0 + \beta_1 R + \beta_2 T + \beta_3 RT.$

The mean percentages for the control group are  $\exp(\beta_0)/(1 + \exp(\beta_0))$  at pre-intervention and  $\exp(\beta_0 + \beta_2)/(1 + \exp(\beta_0 + \beta_2))$  at post-intervention.

The means for the treatment group are  $\exp(\beta_0 + \beta_1)/(1 + \exp(\beta_0 + \beta_1))$  at pre-intervention and  $\exp(\beta_0 + \beta_1 + \beta_2 + \beta_3)/(1 + \exp(\beta_0 + \beta_1 + \beta_2 + \beta_3))$  at post-intervention.

#### The Univariate Delta Method<sup>1</sup>

- Let  $Y \sim \text{Normal}(\mu, \sigma^2)$ ,  $\mu, \sigma^2 \neq 0$ ;  $n =$  sample size.
- Let  $g(Y)$  be a differentiable function of  $Y$  with non-zero first derivative.
- Then, a first-order Taylor series for  $g(Y) = g(\mu) + g'(\mu)(Y - \mu)$ .
- Mean of  $g(Y) \approx g(\mu)$  and Variance of  $g(Y) \approx (g'(\mu))^2 \sigma^2$ .
- Delta Method Theorem:  $\lim_{n \rightarrow \infty} \sqrt{n}(g(Y) - g(\mu)) \xrightarrow{D} \text{Normal}\left(0, \sigma^2 (g'(\mu))^2\right)$ .
- I.E., asymptotic distribution of  $g(Y) = \text{Normal}(g(\mu), (g'(\mu))^2 \sigma^2)$ .
- **Example: Let  $Y \sim \text{Normal}(\mu, \sigma^2)$ . Let  $W = g(Y) = e^Y$ .**
- $g'(\mu) = e^\mu$ .
- Using the delta method, mean of  $W = g(\mu) = e^\mu$  and
- Variance of  $W = (g'(\mu))^2 \sigma^2 = e^{2\mu} \sigma^2$ ; Standard deviation of  $W = e^\mu \sigma$ .
- Asymptotic distribution of  $W = \text{Normal}(e^\mu, e^{2\mu} \sigma^2)$ .

#### The Multivariate Delta Method<sup>2</sup>

- Let  $Y$  be a multivariate vector of  $m$  normal variables,  $Y = [Y_1 Y_2 \dots Y_m]$ .
- $Y \sim N(\mu, \Sigma)$ , where  $\Sigma$  is a  $m \times m$  covariance matrix.
- Let  $g(Y)$  be a differentiable function of  $Y$  with non-zero first derivative.

- The multivariate delta method states that if  $\lim_{n \rightarrow \infty} \sqrt{n}(Y - \mu) \xrightarrow{D} N(0, \Sigma)$ , then  $\lim_{n \rightarrow \infty} \sqrt{n}(g(Y) - g(\mu)) \xrightarrow{D} N(0, J_g(\mu) \Sigma J_g^T(\mu))$ .
- Where  $J_g(\mu)$  is the Jacobian matrix, evaluated at  $Y = \mu$ .

$$J_g(\mu) = \begin{bmatrix} \frac{\partial g_1(Y)}{\partial Y_1} & \frac{\partial g_1(Y)}{\partial Y_2} & \dots & \frac{\partial g_1(Y)}{\partial Y_m} \\ \frac{\partial g_2(Y)}{\partial Y_1} & \frac{\partial g_2(Y)}{\partial Y_2} & \dots & \frac{\partial g_2(Y)}{\partial Y_m} \\ \vdots & \vdots & \ddots & \vdots \\ \frac{\partial g_m(Y)}{\partial Y_1} & \frac{\partial g_m(Y)}{\partial Y_2} & \dots & \frac{\partial g_m(Y)}{\partial Y_m} \end{bmatrix} \text{ evaluated at } Y = \mu.$$

### Application of the Multivariate Delta Method to Report the Outcomes of a Generalized Estimating Equation for a Binary Variable As Percentages Instead of As Odds Ratios<sup>2</sup>.

(Note: Reference shows how to apply the delta method to the log transform when used with a linear mixed model. The same methodology can be used to calculate percentages from a logistic model.)

- The  $\beta$ 's are assumed to be multivariate normal, with covariance matrix  $\Sigma_\beta$ .
- Percent success of control group at time 1 =  $\exp(\beta_0)/(1 + \exp(\beta_0))$ .
- $g_1(\beta) = \exp(\beta_0)/(1 + \exp(\beta_0))$ .
- Note that  $\partial g_1(\beta)/\partial \beta_0 = \exp(\beta_0)/(1 + \exp(\beta_0))^2$  and  $\partial g_1(\beta)/\partial \beta_i = 0$  if  $i > 0$ .
- 
- Percent success of control group at time 2 =  $\exp(\beta_0 + \beta_2)/(1 + \exp(\beta_0 + \beta_2))$ .
- Let  $g_2(\beta) = \exp(\beta_0 + \beta_2)/(1 + \exp(\beta_0 + \beta_2))$ . Note that  $\partial g_2(\beta)/\partial \beta_0 = \partial g_2(\beta)/\partial \beta_2 = \exp(\beta_0 + \beta_2)/(1 + \exp(\beta_0 + \beta_2))^2$  and  $\partial g_2(\beta)/\partial \beta_i = 0$  for  $i \neq 0$  and  $i \neq 2$ .
- 
- Same property holds for  $g_3$  and  $g_4$  derivatives with respect to the  $\beta$ 's.
- Percent success of treatment group at time 1 =  $\exp(\beta_0 + \beta_1)/(1 + \exp(\beta_0 + \beta_1))$ .
- $g_3(\beta) = \exp(\beta_0 + \beta_1)/(1 + \exp(\beta_0 + \beta_1))$ .
- $\partial g_3(\beta)/\partial \beta_0 = \partial g_3(\beta)/\partial \beta_1 = \exp(\beta_0 + \beta_1)/(1 + \exp(\beta_0 + \beta_1))^2$ , and  $\partial g_3(\beta)/\partial \beta_i = 0$  for  $i > 1$ .
- 
- Percent success of treatment group at time 2 =  $\exp(\beta_0 + \beta_1 + \beta_2 + \beta_3)/(1 + \exp(\beta_0 + \beta_1 + \beta_2 + \beta_3))$ .
- $g_4(\beta) = \exp(\beta_0 + \beta_1 + \beta_2 + \beta_3)/(1 + \exp(\beta_0 + \beta_1 + \beta_2 + \beta_3))$
- $\partial g_4(\beta)/\partial \beta_i = \exp(\beta_0 + \beta_1 + \beta_2 + \beta_3)/(1 + \exp(\beta_0 + \beta_1 + \beta_2 + \beta_3))^2$ ,  $0 \leq i \leq 3$ .

**Jacobian Matrix for  $g(\beta)$ .**

$$J_g(\beta) = \begin{bmatrix} \frac{\exp(\beta_0)}{(1 + \exp(\beta_0))^2} & 0 & 0 & 0 \\ \frac{\exp(\beta_0 + \beta_2)}{(1 + \exp(\beta_0 + \beta_2))^2} & 0 & \frac{\exp(\beta_0 + \beta_2)}{(1 + \exp(\beta_0 + \beta_2))^2} & 0 \\ \frac{\exp(\beta_0 + \beta_1)}{(1 + \exp(\beta_0 + \beta_1))^2} & \frac{\exp(\beta_0 + \beta_1)}{(1 + \exp(\beta_0 + \beta_1))^2} & 0 & 0 \\ \frac{\exp\left(\sum_{i=0}^3 \beta_i\right)}{\left(1 + \exp\left(\sum_{i=0}^3 \beta_i\right)\right)^2} & \frac{\exp\left(\sum_{i=0}^3 \beta_i\right)}{\left(1 + \exp\left(\sum_{i=0}^3 \beta_i\right)\right)^2} & \frac{\exp\left(\sum_{i=0}^3 \beta_i\right)}{\left(1 + \exp\left(\sum_{i=0}^3 \beta_i\right)\right)^2} & \frac{\exp\left(\sum_{i=0}^3 \beta_i\right)}{\left(1 + \exp\left(\sum_{i=0}^3 \beta_i\right)\right)^2} \end{bmatrix}$$

In simpler form,  $J_g(\beta) = \begin{bmatrix} W_1 & 0 & 0 & 0 \\ W_2 & 0 & W_2 & 0 \\ W_3 & W_3 & 0 & 0 \\ W_4 & W_4 & W_4 & W_4 \end{bmatrix}$ .

Define the covariance matrix for the  $\beta$ 's as  $\Sigma_\beta = \begin{bmatrix} \sigma_{\beta 00}^2 & \sigma_{\beta 01} & \sigma_{\beta 02} & \sigma_{\beta 03} \\ \sigma_{\beta 01} & \sigma_{\beta 11}^2 & \sigma_{\beta 12} & \sigma_{\beta 13} \\ \sigma_{\beta 02} & \sigma_{\beta 12} & \sigma_{\beta 22}^2 & \sigma_{\beta 23} \\ \sigma_{\beta 03} & \sigma_{\beta 13} & \sigma_{\beta 23} & \sigma_{\beta 33}^2 \end{bmatrix}$ .

The covariance matrix for W (estimates for each group at each time point) will be  $\Sigma_W = J_g(\beta) \times \Sigma_\beta \times (J_g(\beta))^T$ .

**Example SAS Code to Compute Covariance Matrix With Four Time Points (Other software could be used. The delta method can be applied with any statistical software.)**

```
*** PHQ Bin, Minimally Depressed or Greater ***;
ods html; ods graphics on;
Proc Genmod Data=AcrossTimeLong_Ypsi Descending;
Class REACHID TimepointN RandomizationN;
Model PHQBin=TimepointN RandomizationN TimepointN*RandomizationN / dist=bin;
Repeated Subject=REACHID / Type=UN Modelse ECOVB;
ODS OUTPUT GEEModPEst=RegBinPHQ GEERCov=CovBPHQ;
Run;
```

```

ods graphics off; ods html close;

/* PHQBin: Compute standard errors for difference scores via the delta method */
ods html path="c:\temp";
Proc IML;
/* Input beta vector; begin at B1 instead of B0 because SAS numbers parameters
starting at 1 */
use regbinphq; read all var {'Estimate'} into B; close regbinphq;
/* B5=B7=B9=B11=B13=B14=B15=0 reference levels */
B00 = B[1]; /* B00 = control group at baseline */
B10 = B[1] + B[6]; /* B10 = peer group at baseline */
B01 = B[1] + B[4]; /* B01 = control group at 3 months */
B11 = B[1] + B[4] + B[6] + B[12]; /* B11 = peer group at 3 months */
B02 = B[1] + B[3]; /* B02 = control group at 9 months */
B12 = B[1] + B[3] + B[6] + B[10]; /* B12 = peer group at 9 months */
B03 = B[1] + B[2]; /* B03 = control group at 15 months */
B13 = B[1] + B[2] + B[6] + B[8]; /* B12 = peer group at 15 months */

/* Convert to exp scale */
expB00=exp(B00)/((1+exp(B00))**2);
expB10=exp(B10)/((1+exp(B10))**2);
expB01=exp(B01)/((1+exp(B01))**2);
expB11=exp(B11)/((1+exp(B11))**2);
expB02=exp(B02)/((1+exp(B02))**2);
expB12=exp(B12)/((1+exp(B12))**2);
expB03=exp(B03)/((1+exp(B03))**2);
expB13=exp(B13)/((1+exp(B13))**2);

/* Input covariance matrix, 8x8 matrix */
use CovBPHQ; read all var{'Prm1' 'Prm2' 'Prm3' 'Prm4' 'Prm6' 'Prm8' 'Prm10' 'Prm12'}
into CovB; close CovBPHQ; print CovB;

/* Construct W, 8x8 matrix */
W=j(8,8,0);
W[1,1]=expB00;

z={1 5};
W[2,z]=expB10;

z={1 4};
W[3, z]=expB01;

z={1 4 5 8};
W[4,z]=expB11;

z={1 3};

```

```

W[5,z]=expB02;

z={1 3 5 7};
W[6,z]=expB12;

W[7,1:2]=expB03;

z={1 2 5 6};
W[8,z]=expB13;

print W;

/* V=W*CovB*T(W) = cov matrix of exp(Bij)/((1+exp(Bij))**2), i=0 to 1, j=0 to 3 */
reset fuzz; /* This corrects rounding errors. */
V=W*CovB*T(W);
print V;
quit;
ods html close;

```

## REFERENCES

<sup>1</sup>Multivariate Delta Method: Reference: Casella G, Berger RL. Statistical inference. 2nd ed. Pacific Grove, CA: Duxbury; 2002.

<sup>2</sup>Sinco B., Kieffer E., Spencer M. Using the Delta Method to generate means and confidence intervals from a Linear Mixed Model on the original scale, when the analysis is done on the log scale. Presented at the American Statistical Association's Conference on Statistical Practice in New Orleans, 2/20/2015.
